# Supplementary material for: MicroRNA-205-5p inhibits three-dimensional spheroid proliferation of ErbB2-overexpressing breast epithelial cells through direct targeting of CLCN3
Source: PeerJ. 2019 Oct 8;7:e7799. doi: 10.7717/peerj.7799 (PMC6788438; doi:10.7717/peerj.7799)
Supplement: Data S1 [file peerj-07-7799-s009.xlsx]

## Sheet: Figure 1
	CLCN3/actin	CLCN3/actin	CLCN3/actin	CLCN3/actin	CLCN3/actin	MEAN	SEM
MCF10A	1	1	1	1	1	1	0
MCF10A-neo	1.20729	0.656716	1.61566	0.92018	0.843957	1.04876	0.167135
MCF10A-ErbB2	1.91201	2.14705	2.1704	1.43733	2.84072	2.1015	0.22697
MCF10A-ErbB2/Negative control precursor	2.71033	1.62145	2.73702	2.23073	1.34793	2.12949	0.281572
MCF10A-ErbB2/miR-205-5p precursor	0.986779	0.403973	1.03653	1.24711	1.05049	0.944976	0.142344

## Sheet: Figure 2A
				MEAN	SEM
CLCN3	Negative control mimic	RIP-Ago	1.02655	1	0.0373811
			1.02931
			0.944144
			0.858362
			1.09371
			1.04793
			1.08746
			0.793005
			1.11954
		RIP-IgG	0.0108203	0.0200138	0.00240082
			0.0138886
			0.0100586
			0.0212329
			0.0260073
			0.0186048
			0.0261586
			0.030413
			0.0229403
	miR-205-5p mimic	RIP-Ago	2.26261	3.06752	0.28775
			2.02418
			2.44165
			2.80853
			2.58185
			3.11701
			3.96507
			3.93684
			4.46993
		RIP-IgG	0.00636206	0.00644461	0.000630796
			0.00326934
			0.00587031
			0.00840435
			0.00786814
			0.00694674
			0.00457318
			0.0092186
			0.00548875
ZEB2	Negative control mimic	RIP-Ago	0.838511	1	0.0438405
			1.10356
			1.05793
			0.902906
			1.00756
			1.08953
		RIP-IgG	0.0318512	0.0181414	0.00374144
			0.020131
			0.0132286
			0.00920514
			0.0250371
			0.00939551
	miR-205-5p mimic	RIP-Ago	2.40187	2.58663	0.0945176
			2.44659
			2.54893
			2.86401
			2.37204
			2.88637
		RIP-IgG	0.00694946	0.00796391	0.00126438
			0.00964963
			0.00984708
			0.00855083
			0.00219418
			0.0105923
Actin	Negative control mimic	RIP-Ago	0.970215	1	0.0277269
			1.04106
			0.988723
			0.951406
			0.932589
			1.11601
		RIP-IgG	0.00826534	0.00760385	0.000680287
			0.0102447
			0.00759383
			0.00721979
			0.00717346
			0.00512605
	miR-205-5p mimic	RIP-Ago	0.911403	0.89957	0.0324375
			0.88813
			1.00593
			0.868677
			0.771778
			0.951504
		RIP-IgG	0.00921764	0.00841768	0.000419656
			0.00971483
			0.00898144
			0.00794556
			0.00721207
			0.00743452

## Sheet: Figure 3A
			MEAN	SEM
MCF10A-neo	Negative control mimic	1.08749	100	4.46988
		0.99305
		1.18046
		0.81303
		0.971221
		0.954747
		1.17943
		0.554521
		1.1789
		0.977022
		1.12746
		0.982668
		1.14728
		1.01534
		1.26484
		0.819387
		0.753149
	miR-205-5p mimic	1.3079	82.4365	5.81761
		0.927782
		0.952509
		1.14682
		1.01247
		0.968465
		0.876497
		0.996978
		0.488579
		0.622953
		0.656008
		0.661816
		0.708587
		0.532648
		0.690086
		0.639733
MCF10A-ErbB2	Negative control mimic	0.936408	100	4.11687
		1.14939
		0.892577
		1.02163
		1.18174
		1.05931
		0.881134
		1.16938
		0.708437
		0.825418
		1.23955
		1.01115
		0.875807
		1.04807
	miR-205-5p mimic	0.70689	51.7421	2.65816
		0.400477
		0.372277
		0.329924
		0.541258
		0.444749
		0.563005
		0.622527
		0.424733
		0.538834
		0.604456
		0.675447
		0.55185
		0.472578
		0.515891
		0.513836

## Sheet: Figure 3B
		MEAN	SEM
mut1/ Negative control mimic	140.995	100	8.85161
	122.038
	111.116
	60.7794
	98.8977
	66.1736
	101.169
	81.1718
	117.66
mut1/ miR-205-5p mimic	153.638	93.1814	8.41684
	96.8569
	94.5557
	76.3452
	75.5886
	105.865
	83.6189
	76.3968
	75.767
mut2/ Negative control mimic	135.892	100	6.60807
	129.078
	98.9703
	66.8314
	69.2281
	106.45
	102.083
	91.4671
	110.085
	108.188
	81.7267
mut2/ miR-205-5p mimic	23.6971	50.4828	8.81873
	19.4454
	28.6894
	24.4434
	17.37
	26.3998
	80.6535
	52.755
	66.5102
	100.022
	79.253
	86.5551
mut3/ Negative control mimic	100.434	100	5.97505
	88.7532
	110.813
	89.7779
	86.7986
	123.424
mut3/ miR-205-5p mimic	62.7226	65.8066	5.0257
	65.0896
	62.6506
	46.9598
	83.6899
	73.7269

## Sheet: Figure 4A
	ΔΔCt	2-ΔΔCt	MEAN	SEM
Vehicle	0.0350357	0.976008	1.00267	0.033642
	0.120766	0.919699
	-0.210766	1.1573
	0.0321369	0.977971
	0.0529404	0.96397
	-0.030113	1.02109
MCF10A-neo-derived exosomes	-2.94223	7.68599	7.00615	0.384875
	-2.81302	7.02753
	-3.06765	8.38407
	-2.62366	6.16311
	-2.79482	6.93943
	-2.54518	5.83679

## Sheet: Figure 4B
		MEAN	SEM
Vehicle	0.938674	1	0.0997486
	0.970261
	1.17148
	0.784001
	0.695245
	0.987314
	0.915675
	0.826433
	1.71092
MCF10A-neo-derived exosomes	0.980983	0.832109	0.0548487
	1.05355
	0.912013
	0.592061
	0.694289
	0.625862
	0.901044
	0.945224
	0.783956

## Sheet: Figure 5A
		MEAN	SEM
Vehicle	98.2803	100	1.8449
	103.181
	98.5383
	97.1643
	106.594
	96.2419
	103.393
	89.7321
	106.875
MCF10A-neo-derived exosomes	46.1737	56.1635	3.27894
	50.4299
	53.2674
	69.6959
	59.1391
	73.2832
	54.375
	44.1964
	54.9107

## Sheet: Figure 5B
		MEAN	SEM
SKBR3/ Control shRNA	112.388	100	2.74329
	95.2996
	92.3122
	89.8917
	108.6
	101.508
	93.32
	97.7797
	108.9
SKBR3/ CLCN3 shRNA	60.1002	62.1751	5.20532
	75.3218
	68.2564
	43.8128
	48.7816
	48.2108
	86.1637
	79.284
	49.6447
MDA-MB-453/ Control shRNA	91.8837	100	3.70159
	91.4853
	116.631
	104.996
	88.6917
	106.312
	84.2503
	106.031
	109.719
MDA-MB-453/ Control shRNA	64.281	56.3217	3.99978
	75.238
	68.863
	45.4754
	45.6522
	44.7878
	56.0241
	63.0441
	43.5302

## Sheet: Supplementary Figure 2
	ΔΔCt	2-ΔΔCt	MEAN	SEM
MCF10A-neo- derived exosomes	-0.708317	1.6339	1.14461	0.186312
	-0.671575	1.59281
	0.220401	0.858327
	-0.797195	1.73772
	-0.749346	1.68103
	-0.418497	1.33653
	1.01351	0.495339
	0.930899	0.524531
	1.18012	0.441316
MCF10A-ErbB2- derived exosomes	10.988	0.000492361	0.000331725	4.6092e-05
	11.5008	0.000345081
	11.3818	0.000374733
	11.5329	0.000337486
	11.1432	0.000442129
	10.9685	0.000499072
	12.3242	0.000195
	12.7469	0.000145477
	12.663	0.000154185

## Sheet: Supplementary Figure 3
	CLCN3	actin	CLCN3/actin
SKBR3/Control shRNA	10143	7654.01	1.32519	1
SKBR3/CLCN3 shRNA	3729.97	4426.36	0.842672	0.635888
MDA-MB-453/Control shRNA	58237.4	9584.3	6.07633	1
MDA-MB-453/CLCN3 shRNA	5060.1	11309.9	0.447403	0.0736305

[truncated: 4 more sheets: Supplementary Figure 4, Supplementary Figure 6, Supplementary Figure 7A, Supplementary Figure 7B]
